# Supplementary material for: Polyphenols and Maillard Reaction Products in Dried Prunus spinosa Fruits: Quality Aspects and Contribution to Anti-Inflammatory and Antioxidant Activity in Human Immune Cells Ex Vivo
Source: MDPI journal article supplement (doi:10.3390/molecules27103302), 2022-05-20
Supplement: s1 [file s1]

Supplementary Material for:

# Polyphenols and Maillard Reaction Products in Dried *Prunus spinosa* Fruits: Quality Aspects and Contribution to Anti-Inflammatory and Antioxidant Activity in Human Immune Cells *Ex Vivo*

Anna Magiera <sup>1,\*</sup>, Monika Ewa Czerwińska<sup>2,3</sup>, Aleksandra Owczarek<sup>1</sup>, Anna Marchelak<sup>1</sup>, Sebastian Granica<sup>4</sup> and Monika Anna Olszewska<sup>1</sup>

<sup>1</sup> Department of Pharmacognosy, Faculty of Pharmacy, Medical University of Lodz, 1 Muszynskiego St., 90-151 Lodz, Poland

<sup>2</sup> Department of Biochemistry and Pharmacogenomics, Medical University of Warsaw, 1 Banacha St., 02-097 Warsaw, Poland

<sup>3</sup> Centre for Preclinical Research, Medical University of Warsaw, 1B Banacha St., 02-097 Warsaw, Poland

<sup>4</sup> Microbiota Lab, Centre for Preclinical Studies, Department of Pharmacognosy and Molecular Basis of Phytotherapy, Medical University of Warsaw, 1 Banacha St., 02-097 Warsaw, Poland

\* Correspondence: [anna.magiera@umed.lodz.pl](mailto:anna.magiera@umed.lodz.pl) (A. Magiera); Tel.: +48 503316997

## Supplementary Material

### Table of Contents

#### S.1. Results

**Table S1.** UHPLC-PDA-ESI-MS<sup>3</sup> identification data of compounds detected in the dried fruit extracts of *P. spinosa*.

**Figure S1.** Representative UHPLC chromatograms.

**Table S2.** Quantitative profile of the *P. spinosa* fruit.

**Figure S2.** Effect of the fruit extracts and pure compounds on viability (membrane integrity) of human immune cells.

**Table S3.** Correlation (*r*) coefficients and probability (*p*) values of linear relationships between antioxidant and anti-inflammatory activity parameters and phenolic contents of *P. spinosa* fruits extracts.

### References

## S.1. Results

**Table S1.** UHPLC-PDA-ESI-MS<sup>3</sup> identification data of compounds detected in the dried fruit extracts of *Prunus spinosa*.

| Peak | Analyte                                                                              | R <sub>t</sub><br>(min) | UV λ <sub>max</sub><br>(nm) | [M–H] <sup>–</sup><br>(m/z) | Fragmentary<br>ions              | [M+H] <sup>+</sup><br>(m/z) | Fragmen-<br>tary ions | Extracts                     | References |
|------|--------------------------------------------------------------------------------------|-------------------------|-----------------------------|-----------------------------|----------------------------------|-----------------------------|-----------------------|------------------------------|------------|
| 1    | 3-Hydroxy-2,3-dihydromaltol<br>(2,3-dihydro-3,5-dihydroxy-6-methyl-4(H)-pyran-4-one) | 2.5                     | 295                         | -                           | -                                | 145                         | -                     | BFD, DEFD, EAFD, MED         | [1]        |
| 2    | 5-Hydroxymethylfurfural (HMF) <sup>a,b</sup>                                         | 3.2                     | 285                         | -                           | -                                | 127                         | 109                   | BFD, DEFD, EAFD, MED,<br>WRD | [2, 3]     |
| 3    | 5-Hydroxymethoxymethyl-2-furanmethanol <sup>b</sup>                                  | 3.2                     | 285                         | -                           | -                                | -                           | -                     | BFD, DEFD, EAFD, MED,<br>WRD | -          |
| 4    | Vanillic acid <i>O</i> -hexoside                                                     | 3.9                     | 250, 290                    | 329                         | 167                              | -                           | -                     | BFD, EAFD, MED, WRD          | -          |
| 5    | Protocatechuic acid 4- <i>O</i> -hexoside                                            | 4.3                     | 280                         | 315                         | 153                              | -                           | -                     | EAFD                         | [4]        |
| 6    | Protocatechuic acid <sup>a</sup>                                                     | 4.6                     | 260<br>295                  | 153                         | 153                              | 155                         | 155                   | DEFD, EAFD                   | -          |
| 7    | Unidentified                                                                         | 5.2                     | 325                         | 517                         | 335                              | -                           | -                     | BFD, MED, WRD                | -          |
| 8    | <i>cis</i> -3- <i>O</i> -Caffeoylquinic acid                                         | 5.7                     | 322                         | 353                         | 191, 179                         | -                           | -                     | BFD, MED                     | [5]        |
| 9    | 3- <i>O</i> -Caffeoylquinic acid hexoside                                            | 6.2                     | 325<br>295                  | 515                         | 353 (191, 179),<br>335, 341, 179 | -                           | -                     | BFD, MED                     | [6]        |
| 10   | 3- <i>O</i> -Caffeoylquinic acid (neochlorogenic acid) <sup>a</sup>                  | 6.7                     | 325<br>265,211              | 353                         | 191, 179, 135                    | -                           | -                     | BFD, DEFD, EAFD, MED,<br>WRD | [7]        |
| 11   | <i>p</i> -Hydroxybenzoic acid <sup>a</sup>                                           | 7.1                     | 267<br>290                  | 137                         | -                                | -                           | -                     | DEFD, EAFD                   | -          |
| 12   | Unidentified                                                                         | 7.4                     | 280                         | 505                         | 379                              | -                           | -                     | EAFD                         | -          |
| 13   | (Epi)catechin derivative                                                             | 7.5                     | 280                         | 415                         | 289, 245                         | -                           | -                     | DEFD                         | -          |
| 14   | Caffeoylshikimic acid derivative                                                     | 8.0                     | -                           | 505                         | 335, 179                         | -                           | -                     | EAFD                         | [5]        |
| 15   | Vanilloyl malate hexoside                                                            | 8.9                     | 260                         | 445                         | 329, 167                         | -                           | -                     | EAFD                         | -          |
| 16   | 3- <i>O</i> - <i>p</i> -Coumaroylquinic acid                                         | 9.2                     | 310                         | 337                         | 163, 191                         | -                           | -                     | BFD, DEFD, EAFD, MED         | [5]        |
| 17   | <i>p</i> -Coumaric acid <i>O</i> -hexoside                                           | 9.7                     | 280                         | 325                         | 163                              | -                           | -                     | EAFD                         | [8]        |
| 18   | Amygdalin                                                                            | 10.1                    | 210                         | 456                         | 323, 221                         | -                           | -                     | BFD                          | [9]        |
| 19   | Vanillic acid <sup>a</sup>                                                           | 10.1                    | 216, 260,<br>290            | 167                         | 167                              | 169                         | 169                   | DEFD                         | -          |
| 20   | 5- <i>O</i> -Caffeoylquinic acid (chlorogenic acid, CHA) <sup>a</sup>                | 10.6                    | 325                         | 353                         | 191, 179                         | -                           | -                     | BFD, DEFD, EAFD, MED         | [7]        |
| 21   | <i>cis</i> -3- <i>O</i> -Feruloylquinic acid                                         | 11.0                    | 215, 325,<br>293            | 367                         | 193                              | -                           | -                     | DEFD, EAFD, MED              | [5]        |
| 22   | Unidentified                                                                         | 11.2                    | 300, 225                    | 415                         | 293                              | -                           | -                     | BFD                          | -          |
| 23   | 4- <i>O</i> -Caffeoylquinic acid (cryptochlorogenic acid) <sup>a</sup>               | 11.5                    | 325, 215                    | 353                         | 173, 191, 179                    | -                           | -                     | BFD, DEFD, EAFD, MED         | [7]        |
| 24   | Cyanidin 3- <i>O</i> -glucoside (CYG) <sup>a</sup>                                   | 11.6                    | 515, 280                    | 447                         | 285, 401                         | 449                         | 287                   | BFD                          | -          |
| 25   | Caffeic acid 3/4- <i>O</i> -hexoside                                                 | 12.1                    | 320                         | 341                         | 179, 135                         | -                           | -                     | DEFD, EAFD                   | -          |
| 26   | 3- <i>O</i> -Feruloylquinic acid                                                     | 12.5                    | 322                         | 367                         | 193                              | -                           | -                     | EAFD                         | [5]        |
| 27   | Vanillin <sup>a</sup>                                                                | 13.3                    | 285                         | -                           | -                                | 153                         | 153                   | DEFD, EAFD                   | -          |
| 28   | <i>cis</i> -3- <i>O</i> - <i>p</i> -Coumaroylquinic acid                             | 14.6                    | 305                         | 337                         | 163                              | -                           | -                     | DEFD, EAFD                   | [5]        |
| 29   | Caffeoylquinic acid dehydrodimer                                                     | 14.9                    | 330, 287                    | 705                         | 513, 339                         | -                           | -                     | MED, WRD                     | [10]       |
| 30   | 4- <i>O</i> -Caffeoylshikimic acid                                                   | 15.2                    | 325                         | 335                         | 179, 135                         | -                           | -                     | DEFD, EAFD                   | [5]        |

|    |                                                                                                                               |      |          |     |                            |     |          |                      |      |
|----|-------------------------------------------------------------------------------------------------------------------------------|------|----------|-----|----------------------------|-----|----------|----------------------|------|
| 31 | <i>p</i> -Coumaric acid <sup>a</sup>                                                                                          | 15.8 | 310      | 163 | -                          | -   | -        | DEFD                 | -    |
| 32 | 4- <i>O</i> -Feruloylquinic acid                                                                                              | 16.5 | 320, 217 | 367 | 176                        | -   | -        | EAFD                 | [5]  |
| 33 | Caffeoylshikimic acid                                                                                                         | 17.4 | 280      | 335 | 161, 135, 179              | -   | -        | BFD, DEFD, EAFD, MED | [5]  |
| 34 | Caffeoylshikimic acid                                                                                                         | 18.9 | 215      | 335 | 161, 179                   | -   | -        | DEFD, EAFD           | [5]  |
| 35 | Unidentified                                                                                                                  | 20.9 | 280      | 317 | 287                        | -   | -        | DEFD                 | -    |
| 36 | <i>p</i> -Coumaroylshikimic acid                                                                                              | 23.8 | 300, 205 | 319 | 119, 145, 275,<br>163, 257 | -   | -        | DEFD, EAFD           | [11] |
| 37 | Aromadendrin hexoside (dihydrokaempferol hexoside)                                                                            | 24.3 | 280, 328 | 449 | 287, 151, 269, 201         | -   | -        | EAFD                 | [12] |
| 38 | Quercetin hexoside-pentoside                                                                                                  | 24.7 | 354      | 595 | 301, 433                   | -   | 303      | BFD                  | -    |
| 39 | <i>p</i> -Coumaroylshikimic acid                                                                                              | 25.3 | 313, 290 | 319 | 145, 275, 257              | -   | -        | DEFD, EAFD           | [11] |
| 40 | Quercetin 3- <i>O</i> - $\beta$ -D-galactoside (hyperoside) <sup>a</sup>                                                      | 26.2 | 264, 355 | 463 | 301                        | -   | 303      | EAFD                 | -    |
| 41 | Quercetin 3- <i>O</i> -(6''- <i>O</i> - $\alpha$ -L-rhamnopyranosyl)- $\beta$ -D-glucopyranoside (rutin) <sup>a</sup>         | 26.6 | 265, 350 | 609 | 301                        | -   | 303      | BFD, EAFD, MED       | -    |
| 42 | Quercetin 3- <i>O</i> - $\beta$ -D-glucopyranoside (isoquercitrin) <sup>a</sup>                                               | 27.7 | 260, 355 | 463 | 301                        | -   | 303      | DEFD, EAFD           | -    |
| 43 | Quercetin 3- <i>O</i> -(2''- <i>O</i> - $\beta$ -D-glucopyranosyl)- $\alpha$ -L-arabinofuranoside <sup>a</sup>                | 28.7 | 255, 355 | 595 | 433, 301                   | -   | 303      | BFD, MED             | -    |
| 44 | Quercetin 3- <i>O</i> - $\alpha$ -D-xylopyranoside (reinutrin) <sup>a</sup>                                                   | 30.1 | 256, 356 | 433 | 301                        | 435 | 303      | DEFD, EAFD           | -    |
| 45 | Quercetin 3- <i>O</i> - $\alpha$ -L-arabinopyranoside (guaiaverin) <sup>a</sup>                                               | 30.4 | 255, 355 | 433 | 301                        | 435 | 303      | DEFD, EAFD           | -    |
| 46 | Quercetin 3- <i>O</i> - $\alpha$ -L-arabinofuranoside (avicularin) <sup>a</sup>                                               | 35.1 | 255, 355 | 433 | 301                        | 435 | 303      | DEFD, EAFD, MED      | -    |
| 47 | Quercetin 3- <i>O</i> -(4''- <i>O</i> - $\beta$ -D-glucopyranosyl)- $\alpha$ -L-rhamnopyranoside (multinoside A) <sup>a</sup> | 35.8 | 254, 355 | 609 | 447, 301                   | 611 | 449, 303 | BFD, EAFD, MED       | -    |
| 48 | Quercetin 3- <i>O</i> - $\alpha$ -L-rhamnopyranoside (quercitrin) <sup>a</sup>                                                | 36.5 | 255, 355 | 447 | 301                        | 449 | 303      | DEFD, EAFD, MED      | -    |
| 49 | Quercetin malyol-pentoside                                                                                                    | 38.0 | 254, 350 | 549 | 433, 301                   | -   | 435, 303 | EAFD                 | -    |
| 50 | Quercetin malyol-pentoside                                                                                                    | 39.3 | 255, 355 | 549 | 433, 301                   | -   | 435, 303 | DEFD                 | -    |
| 51 | Kaempferol hexoside                                                                                                           | 42.0 | 255, 355 | 447 | 285                        | -   | 287      | DEFD                 | -    |
| 52 | Quercetin acetyl-hexoside-rhamoside                                                                                           | 46.5 | 254, 350 | 651 | 609, 301                   | -   | 303      | EAFD, MED            | -    |
| 53 | Quercetin (QU) <sup>a</sup>                                                                                                   | 49.2 | 255, 356 | 301 | -                          | -   | 303      | DEFD, EAFD, MED      | -    |
| 54 | Unidentified                                                                                                                  | 50.9 | 350      | 337 | 322                        | -   | -        | DEFD                 | -    |

<sup>a</sup> Identified with authentic standards. <sup>b</sup> Identified by NMR. *Rt*, retention times. UV  $\lambda_{\max}$ , absorbance maxima in UV-Vis spectra. [M-H]<sup>-</sup>, deprotonated molecular ions in MS spectra recorded in a negative ion mode. [M+H]<sup>+</sup>, protonated molecular ions in MS spectra recorded in a positive ion mode. Nomenclature of quinic acid esters including chlorogenic acid isomers is according to IUPAC rules adopted by Clifford et al. [7,13].

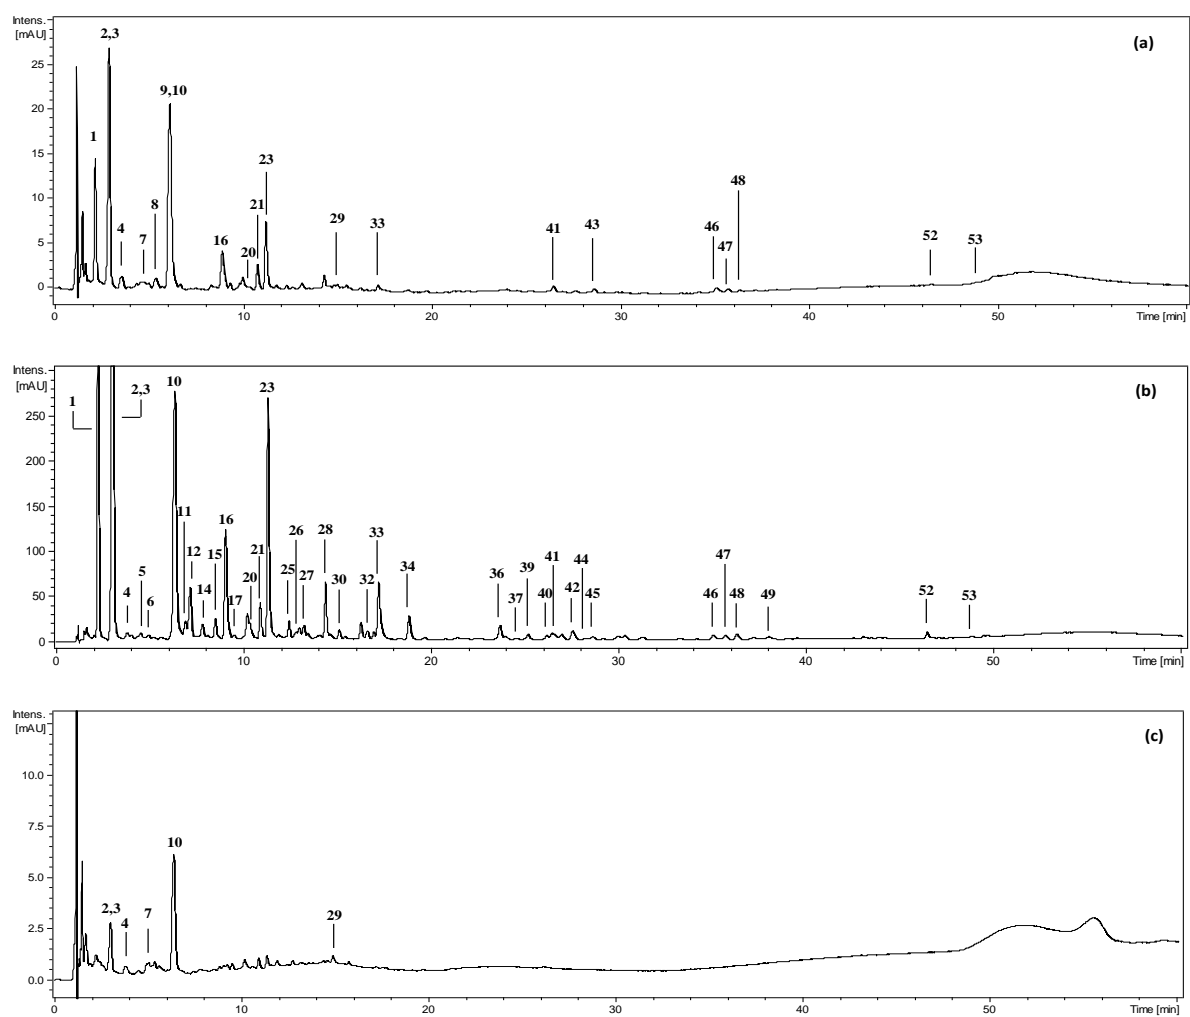

**Figure S1.** Representative UHPLC chromatograms at 280 nm of (a) methanol extract from dried fruits of *Prunus spinosa*, MED; ethyl acetate fraction from dried fruits, EAFD (b); and water residue from dried fruits, WRD. Peak numbers refer to those implemented in the Supplementary Table S1.

**Table S2.** Quantitative profile of the *Prunus spinosa* fruit.

| Total contents:                  | Dried fruit  |              | Fresh fruit   |              |
|----------------------------------|--------------|--------------|---------------|--------------|
|                                  | mg/g fw      | mg/g dw      | mg/g fw*      | mg/g dw      |
| TPC (GAE)                        | 5.47 ± 0.09  | 13.43 ± 0.24 | 13.69 ± 0.55  | 33.63 ± 1.36 |
| TPH                              | 1.96 ± 0.12  | 9.61 ± 0.30  | 4.46 ± 0.09   | 10.97 ± 0.22 |
| TPA                              | 1.67 ± 0.10  | 4.11 ± 0.26  | 3.07 ± 0.05   | 7.55 ± 0.13  |
| TAC                              | n.d.         | n.d.         | 0.72 ± 0.02   | 1.78 ± 0.04  |
| TFL                              | 0.29 ± 0.02  | 0.72 ± 0.04  | 0.66 ± 0.03   | 1.63 ± 0.08  |
| TTC (PB2)                        | 1.67 ± 0.05  | 4.10 ± 0.12  | 6.96 ± 0.30   | 17.10 ± 0.74 |
| MRPs                             | 0.19 ± 0.01  | 0.46 ± 0.03  | n.d.          | n.d.         |
| <b>Individual compounds:</b>     |              |              |               |              |
| Avicularin                       | 0.13 ± 0.02  | 0.32 ± 0.04  | 0.21 ± 0.02   | 0.51 ± 0.05  |
| Hyperoside                       | n.d.         | n.d.         | 0.02 ± 0.0007 | 0.04 ± 0.001 |
| Isoquercitrin                    | n.d.         | n.d.         | 0.01 ± 0.0006 | 0.03 ± 0.001 |
| Rutin                            | 0.08 ± 0.006 | 0.20 ± 0.01  | 0.25 ± 0.003  | 0.61 ± 0.007 |
| Quercitrin                       | 0.02 ± 0.002 | 0.05 ± 0.005 | 0.02 ± 0.001  | 0.06 ± 0.004 |
| Quercetin                        | 0.01 ± 0.002 | 0.03 ± 0.005 | n.d.          | n.d.         |
| Cyanidin 3- <i>O</i> -glucoside  | n.d.         | n.d.         | 0.31 ± 0.02   | 0.75 ± 0.05  |
| Cyanidin 3- <i>O</i> -rutinoside | n.d.         | n.d.         | 0.22 ± 0.01   | 0.53 ± 0.03  |
| Peonidin-3- <i>O</i> -glucoside  | n.d.         | n.d.         | 0.15 ± 0.01   | 0.38 ± 0.01  |
| Neochlorogenic acid              | 0.92 ± 0.07  | 2.27 ± 0.17  | 2.43 ± 0.05   | 5.96 ± 0.11  |
| Chlorogenic acid                 | 0.03 ± 0.002 | 0.07 ± 0.005 | 0.15 ± 0.003  | 0.36 ± 0.007 |
| Cryptochlorogenic acid           | 0.43 ± 0.006 | 1.06 ± 0.01  | 0.24 ± 0.01   | 0.60 ± 0.03  |
| 5-Hydroxymethylfurfural          | 0.16 ± 0.01  | 0.39 ± 0.03  | n.d.          | n.d.         |

Results are presented as means ± SD ( $n = 3$ ). \* Values according to Magiera et al. [14]. TPC, total phenolic contents in gallic acid equivalents (GAE); TPH, total contents of low-molecular-weight phenols determined by HPLC-PDA; TPA, total phenolic acids; TAC, total anthocyanins; TFL, total flavonoids; TTC, total tannins in procyanidin B2 (PB2) equivalents; fw, fresh weight; dw, dry weight. N.d.: below the limits of quantitation (LOQ) or detection (LOD).

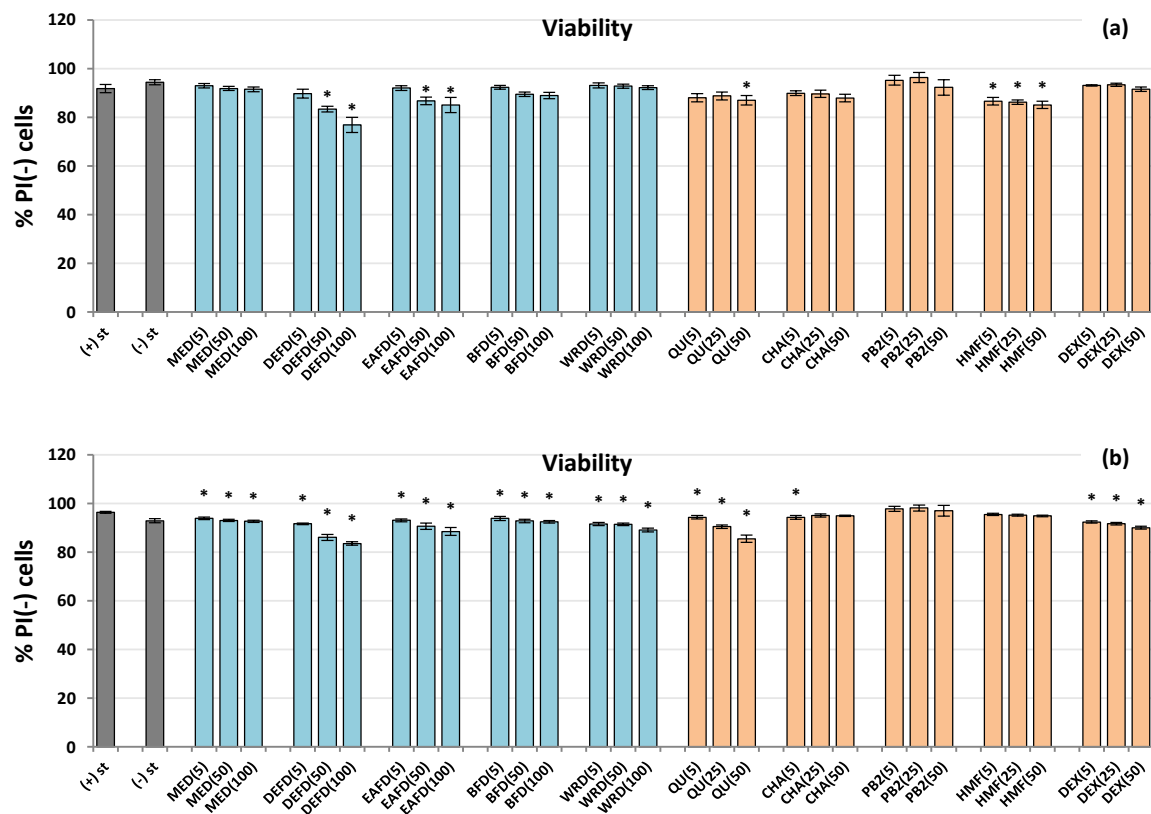

**Figure S2.** Effect of fruit extracts/fractions (5-100  $\mu\text{g/mL}$ ) and standards (5-50  $\mu\text{M}$ ) on viability (membrane integrity) of human immune cells expressed as a percentage of PI(-) cells (propidium iodide-negative): **(a)** effect on viability of neutrophils after 24 h incubation; **(b)** effect on viability of PBMCs after 48 h incubation. Extracts/fractions: MED, methanol-water (75:25, *v/v*) extract of dried fruits; DEFD, diethyl ether fraction of MED; EAFD, ethyl acetate fraction of MED; BFD, *n*-butanol fraction of MED; WRD, water residue of MED. Standards: DEX, dexamethasone; QU, quercetin; CHA, chlorogenic acid; PB2, procyanidin B2; HMF, 5-Hydroxymethylfurfural; Positive control: Triton X-100 solution (98.6% of PI(+) cells). Data expressed as means  $\pm$  SD of five independent experiments performed with cells isolated from five independent donors. Statistical significance in Dunnett's test: \* $p < 0.05$  compared with the stimulated control (+)st.

**Table S3.** Correlation (*r*) coefficients and probability (*p*) values of linear relationships between biological activity parameters and phenolic contents of *Prunus spinosa* fruits extracts.

| Neutrophils             |                  |                                          |                        |                       |
|-------------------------|------------------|------------------------------------------|------------------------|-----------------------|
| <b>r (<i>p</i>) for</b> | <b>ROS level</b> | <b>TNF-<math>\alpha</math> secretion</b> | <b>ELA-2 secretion</b> | <b>IL-8 secretion</b> |
| TPC                     | -0.7099 (0.000)* | -0.5936 (0.020)*                         | -0.6390 (0.002)*       | -0.1314 (0.641)       |
| TPH+TTC                 | -0.6479 (0.001)* | -0.5292 (0.042)*                         | -0.6510 (0.001)*       | -0.1317 (0.625)       |
| PBMCs                   |                  |                                          |                        |                       |
| <b>r (<i>p</i>) for</b> |                  | <b>TNF-<math>\alpha</math> secretion</b> | <b>IL-10 secretion</b> | <b>IL-6 secretion</b> |
| TPC                     |                  | -0.9116 (0.000)*                         | 0.5549 (0.032)*        | -0.9378 (0.000)*      |
| TPH+TTC                 |                  | -0.9134 (0.000)*                         | 0.6685 (0.006)*        | -0.9774 (0.000)*      |

Values calculated using activity and concentration parameters reported in Table 1 and Figures 4-6. TPC, total phenolic contents in gallic acid equivalents (GAE); TPH, total contents of low-molecular-weight phenols determined by HPLC-PDA; TTC, total tannins in procyanidin (PB2) B2 equivalents. Asterisks mean statistical significance of the linear relationships ( $p < 0.05$ ).

---

## References

1. Li, H.; Wu, C.-J.; Tang, X.-Y.; Yu, S.-J. Determination of four bitter compounds in caramel colors and beverages using modified QuEChERS coupled with liquid chromatography-diode array detector-mass spectrometry. *Food Anal. Methods* **2019**, *12*, 1674–1683.
2. Gökmen, V.; Senyuva, H.Z. Improved method for the determination of hydroxymethylfurfural in baby foods using liquid chromatography–mass spectrometry. *J. Agric. Food Chem.* **2006**, *54*, 2845–2849.
3. Teixidó, E.; Moyano, E.; Santos, F.J.; Galceran, M.T. Liquid chromatography multi-stage mass spectrometry for the analysis of 5-hydroxymethylfurfural in foods. *J. Chromatogr. A* **2008**, *1185*, 102–108.
4. Catarino, M.D.; Silva, A.M.S.; Saraiva, S.C.; Sobral, A.B.J.F.N.; Cardoso, S.M. Characterization of phenolic constituents and evaluation of antioxidant properties of leaves and stems of *Eriocephalus africanus*. *Arab. J. Chem.* **2018**, *11*, 62–69.
5. Jaiswal, R.; Sovdat, T.; Vivan, F.; Kuhnert, N. Profiling and characterization by LC-MS<sup>n</sup> of the chlorogenic acids and hydroxycinnamoylshikimate esters in maté (*Ilex paraguariensis*). *J. Agric. Food Chem.* **2010**, *58*, 5471–5481.
6. Jaiswal, R.; Müller, H.; Müller, A.; Karar, M. G.; Kuhnert, N. Identification and characterization of chlorogenic acids, chlorogenic acid glycosides and flavonoids from *Lonicera henryi* L. (Caprifoliaceae) leaves by LC-MS<sup>n</sup>. *Phytochemistry* **2014**, *108*, 252–263.
7. Clifford, M.N.; Johnston, K.L.; Knight, S.; Kuhnert, N. Hierarchical scheme for LC-MS<sup>n</sup> identification of chlorogenic acids. *J. Agric. Food Chem.* **2003**, *51*, 2900–2911.
8. Bystrom, L. M.; Lewis, B.A.; Brown, D.L.; Rodriguez, E.; Obendorf, R.L. Characterization of phenolics by LC-UV/vis, LC-MS/MS and sugars by GC in *Melicoccus bijugatus* Jacq. 'Montgomery' fruits. *Food Chem.* **2008**, *111*, 1017–1024.
9. Xu, S.; Xu, X.; Yuan, S.; Liu, H.; Liu, M.; Zhang, Y.; Zhang, H.; Gao, Y.; Lin, R.; Li, X. Identification and analysis of amygdalin, neoamygdalin and amygdalin amide in different processed bitter almonds by HPLC-ESI-MS/MS and HPLC-DAD. *Molecules* **2017**, *22*, 1425.
10. Castillo-Fraireac, C.M.; Poupard, P.; Guilois-Dubois, S.; Salas, E.; Guyota, S. Preparative fractionation of 5'-O-caffeoylquinic acid oxidation products using centrifugal partition chromatography and their investigation by mass spectrometry. *J. Chromatogr. A* **2019**, *1592*, 19–30.
11. Ben Said, R.; Hamed, A.I.; Mahalel, U.A.; Al-Ayed, A.S.; Kowalczyk, M.; Moldoch, J.; Oleszek, W.; Stochmal, A. Tentative characterization of polyphenolic compounds in the male flowers of *Phoenix dactylifera* by liquid chromatography coupled with mass spectrometry and DFT. *Int. J. Mol. Sci.* **2017**, *18*, E512.
12. Chen, G.; Li, X.; Saleri, F.; Guo, M. Analysis of flavonoids in *Rhamnus davurica* and its antiproliferative activities. *Molecules* **2016**, *21*, E1275.
13. Clifford, M.N.; Knight, S.; Kuhnert, N. Discriminating between the six isomers of dicaffeoylquinic acid by LC-MS<sup>n</sup>. *J. Agric. Food Chem.* **2005**, *53*, 3821–3832.
14. Magiera, A.; Czerwińska, M.E.; Owczarek, A.; Marchelak, A.; Granica, S.; Olszewska, M.A. Polyphenol-enriched extracts of *Prunus spinosa* fruits: Anti-inflammatory and antioxidant effects in human immune cells ex vivo in relation to phytochemical profile. *Molecules* **2022**, *27*, 1691.
